# Supplementary material
Source: publisher figshare collection journal article supplement (https://diabetesjournals.figshare.com/articles/dataset/_/14597091)
Supplement: Supplementary file 1 [file 1]

Supplementary table 1. Code for drug and PCI (percutaneous coronary intervention) code

(A) Drug code

| Drug               | Code      | Code name                                                                                                                                     |
|--------------------|-----------|-----------------------------------------------------------------------------------------------------------------------------------------------|
| omega-3 fatty acid | 478601ACS | omega-3-acid ethyl esters90 1g (as EPA ethylester 0.46g, DHA ethylester 0.38g, α-tocopherol 4mg)                                              |
|                    | 663400ACS | omega-3-acid ethyl esters90 1g (as EPA ethylester 0.46g, DHA ethylester 0.38g, α-tocopherol 4mg) + rosuvastatin calcium (as rosuvastatin 5mg) |
| fenofibrate        | 642301ACH | choline fenofibrate (as fenofibric acid 0.135g)                                                                                               |
|                    | 642301ACR | choline fenofibrate (as fenofibric acid 0.135g)                                                                                               |
|                    | 642301ATR | choline fenofibrate (as fenofibric acid 0.135g)                                                                                               |
|                    | 631400ATB | fenofibrate 0.145g + simvastatin 20mg                                                                                                         |
|                    | 631500ATB | fenofibrate 0.145g + simvastatin 40mg                                                                                                         |
|                    | 519300ACH | fenofibrate 0.16g + pravastatin sodium 40mg                                                                                                   |
|                    | 157701ACH | fenofibrate 100mg                                                                                                                             |
|                    | 157703ACH | fenofibrate 160mg                                                                                                                             |
|                    | 157703ATB | fenofibrate 160mg                                                                                                                             |
|                    | 157703ATR | fenofibrate 160mg                                                                                                                             |
|                    | 194902ACH | fenofibrate granule(micronized) (as fenofibrate 0.13g)                                                                                        |
|                    | 194901ACH | fenofibrate granule(micronized) (as fenofibrate 0.2g)                                                                                         |
|                    | 157702ACR | fenofibrate pellet (as fenofibrate 0.25g)                                                                                                     |
|                    | 194930ACH | fenofibrate(micronized) 0.16g                                                                                                                 |
|                    | 194930ATB | fenofibrate(micronized) 0.16g                                                                                                                 |
|                    | 520301ACH | fenofibric acid 0.135g                                                                                                                        |
| statin             | 111501ATB | atorvastatin calcium (as atorvastatin 10mg)                                                                                                   |
|                    | 130402ATB | cerivastatin sodium 300 μg                                                                                                                    |
|                    | 162403ATR | fluvastatin 80mg                                                                                                                              |
|                    | 227801ATB | simvastatin 20mg                                                                                                                              |
|                    | 454001ATB | rosuvastatin calcium (as rosuvastatin 10mg)                                                                                                   |
|                    | 471000ATB | ezetimibe 10mg + simvastatin 10mg                                                                                                             |
|                    | 502202ATB | atorvastatin strontium pentahydrat (as atorvastatin 20mg)                                                                                     |
|                    | 524000ATB | atorvastatin calcium (as atorvastatin 10mg) + irbesartan 0.15g                                                                                |
|                    | 526300ATB | olmesartan medoxomil 20mg + rosuvastatin calcium (as rosuvastatin 10mg)                                                                       |
|                    | 614500ATB | S-amlodipine besylate (as S-amlodipine 2.5mg) + atorvastatin calcium (as atorvastatin 10mg)                                                   |
|                    | 630200ATB | rosuvastatin calcium(as rosuvastatin 20mg) + telmisartan 80mg                                                                                 |
|                    | 633900ATB | atorvastatin calcium(as atorvastatin 20mg) + ezetimibe 10mg                                                                                   |
|                    | 640700ATB | ezetimibe 10mg + rosuvastatin calcium (as rosuvastatin 5mg)                                                                                   |
|                    | 654600ATB | fimasartan potassium trihydrate (as fimasartan potassium 0.12g) + rosuvastatin calcium (as rosuvastatin 20mg)                                 |
|                    | 661900ATB | candesartan cilexetil 8mg + rosuvastatin calcium (as rosuvastatin 10mg)                                                                       |
|                    | 664100ATB | amlodipine camsylate (as amlodipine 5mg) + losartan potassium (as losartan 45.8mg) + rosuvastatin calcium (as rosuvastatin 20mg)              |
|                    | 111502ATB | atorvastatin calcium (as atorvastatin 20mg)                                                                                                   |
|                    | 130403ATB | cerivastatin sodium 400 μg                                                                                                                    |
|                    | 185801ATB | lovastatin 20mg                                                                                                                               |
|                    | 227801ATR | simvastatin 20mg                                                                                                                              |
|                    | 454002ATB | rosuvastatin calcium (as rosuvastatin 20mg)                                                                                                   |
|                    | 471100ATB | ezetimibe 10mg + simvastatin 20mg                                                                                                             |
|                    | 502203ATB | atorvastatin strontium pentahydrat (as atorvastatin 40mg)                                                                                     |
|                    | 524100ATB | atorvastatin calcium (as atorvastatin 20mg) + irbesartan 0.15g                                                                                |
|                    | 526400ATB | olmesartan medoxomil 20mg + rosuvastatin calcium (as rosuvastatin 20mg)                                                                       |

|           |                                                                                                                                               |
|-----------|-----------------------------------------------------------------------------------------------------------------------------------------------|
| 629700ATB | rosuvastatin calcium (as rosuvastatin 5mg) + valsartan 80mg                                                                                   |
| 631400ATB | fenofibrate 0.145g + simvastatin 20mg                                                                                                         |
| 634800ATB | atorvastatin calcium(as atorvastatin 40mg) + ezetimibe 10mg                                                                                   |
| 640800ATB | ezetimibe 10mg + rosuvastatin calcium (as rosuvastatin 10mg)                                                                                  |
| 654700ATB | fimasartan potassium trihydrate (as fimasartan potassium 60mg) + rosuvastatin calcium (as rosuvastatin 10mg)                                  |
| 662000ATB | candesartan cilexetil 16mg + rosuvastatin calcium (as rosuvastatin 10mg)                                                                      |
| 664200ATB | amlodipine camsylate (as amlodipine 5mg) + losartan potassium (as losartan 91.6mg) + rosuvastatin calcium (as rosuvastatin 5mg)               |
| 111503ATB | atorvastatin calcium (as atorvastatin 40mg)                                                                                                   |
| 130404ATB | cerivastatin sodium 800 µg                                                                                                                    |
| 216601ATB | pravastatin sodium 10mg                                                                                                                       |
| 227802ATB | simvastatin 40mg                                                                                                                              |
| 454003ATB | rosuvastatin calcium (as rosuvastatin 5mg)                                                                                                    |
| 472300ATB | amlodipine besylate (as amlodipine 5mg) + amlodipine besylate (as amlodipine 5mg) + atorvastatin calcium (as atorvastatin 10mg)               |
| 502204ATB | atorvastatin strontium pentahydrat (as atorvastatin 80mg)                                                                                     |
| 525000ATB | rosuvastatin calcium (as rosuvastatin 10mg) + valsartan 80mg                                                                                  |
| 526500ATB | olmesartan medoxomil 40mg + rosuvastatin calcium (as rosuvastatin 20mg)                                                                       |
| 629800ATB | rosuvastatin calcium (as rosuvastatin 5mg) + valsartan 160mg                                                                                  |
| 631500ATB | fenofibrate 0.145g + simvastatin 40mg                                                                                                         |
| 634900ATB | pitavastatin calcium 2mg + valsartan 160mg                                                                                                    |
| 640900ATB | ezetimibe 10mg + rosuvastatin calcium (as rosuvastatin 20mg)                                                                                  |
| 654800ATB | fimasartan potassium trihydrate (as fimasartan potassium 60mg) + rosuvastatin calcium (as rosuvastatin 5mg)                                   |
| 662100ATB | candesartan cilexetil 32mg + rosuvastatin calcium (as rosuvastatin 20mg)                                                                      |
| 664300ATB | amlodipine camsylate (as amlodipine 5mg) + losartan potassium (as losartan 91.6mg) + rosuvastatin calcium (as rosuvastatin 10mg)              |
| 111504ATB | atorvastatin calcium (as atorvastatin 80mg)                                                                                                   |
| 130405ATB | cerivastatin sodium 200 µg                                                                                                                    |
| 216602ATB | pravastatin sodium 5mg                                                                                                                        |
| 227803ATB | simvastatin 10mg                                                                                                                              |
| 470901ATB | pitavastatin calcium 2mg                                                                                                                      |
| 472400ATB | amlodipine besylate (as amlodipine 5mg) + atorvastatin calcium (as atorvastatin 20mg)                                                         |
| 507800ATB | ezetimibe 10mg + simvastatin 40mg                                                                                                             |
| 525100ATB | rosuvastatin calcium (as rosuvastatin 10mg) + valsartan 0.16g                                                                                 |
| 526900ATB | olmesartan medoxomil 20mg + rosuvastatin calcium (as rosuvastatin 5mg)                                                                        |
| 629900ATB | rosuvastatin calcium(as rosuvastatin 10mg) + telmisartan 40mg                                                                                 |
| 631600ATB | rosuvastatin calcium(as rosuvastatin 5mg) + telmisartan 40mg                                                                                  |
| 635000ATB | pitavastatin calcium 2mg + valsartan 80mg                                                                                                     |
| 644100ATB | olmesartan medoxomil 10mg + rosuvastatin calcium (as rosuvastatin 10mg)                                                                       |
| 654900ATB | fimasartan potassium trihydrate (as fimasartan potassium 30mg) + rosuvastatin calcium (as rosuvastatin 10mg)                                  |
| 663400ACS | omega-3-acid ethyl esters90 1g (as EPA ethylester 0.46g, DHA ethylester 0.38g, α-tocopherol 4mg) + rosuvastatin calcium (as rosuvastatin 5mg) |
| 664400ATB | amlodipine camsylate (as amlodipine 5mg) + losartan potassium (as losartan 91.6mg) + rosuvastatin calcium (as rosuvastatin 20mg)              |
| 130401ATB | cerivastatin sodium 100 µg                                                                                                                    |
| 162401ACH | fluvastatin 20mg                                                                                                                              |
| 216603ATB | pravastatin sodium 20mg                                                                                                                       |
| 227805ATB | simvastatin 80mg                                                                                                                              |
| 470902ATB | pitavastatin calcium 1mg                                                                                                                      |
| 472500ATB | amlodipine besylate (as amlodipine 5mg) + atorvastatin calcium (as atorvastatin 40mg)                                                         |
| 518900ATB | amlodipine besylate (as amlodipine 10mg) + atorvastatin calcium (as atorvastatin 20mg)                                                        |
| 525200ATB | rosuvastatin calcium (as rosuvastatin 20mg) + valsartan 80mg                                                                                  |

|           |                                                                                                                                  |
|-----------|----------------------------------------------------------------------------------------------------------------------------------|
| 527000ATB | atorvastatin calcium (as atorvastatin 20mg) + irbesartan 0.3g                                                                    |
| 630000ATB | rosuvastatin calcium(as rosuvastatin 20mg) + telmisartan 40mg                                                                    |
| 631700ATB | rosuvastatin calcium(as rosuvastatin 5mg) + telmisartan 80mg                                                                     |
| 635100ATB | pitavastatin calcium 4mg + valsartan 160mg                                                                                       |
| 644200ATB | olmesartan medoxomil 10mg + rosuvastatin calcium (as rosuvastatin 5mg)                                                           |
| 655000ATB | fimasartan potassium trihydrate (as fimasartan potassium 30mg) + rosuvastatin calcium (as rosuvastatin 5mg)                      |
| 663900ATB | amlodipine camsylate (as amlodipine 5mg) + losartan potassium (as losartan 45.8mg) + rosuvastatin calcium (as rosuvastatin 5mg)  |
| 162402ACH | fluvastatin 40mg                                                                                                                 |
| 216604ATB | pravastatin sodium 40mg                                                                                                          |
| 227806ATB | simvastatin 5mg                                                                                                                  |
| 470903ATB | pitavastatin calcium 4mg                                                                                                         |
| 502201ATB | atorvastatin strontium pentahydrat (as atorvastatin 10mg)                                                                        |
| 519300ACH | fenofibrate 0.16g + pravastatin sodium 40mg                                                                                      |
| 525300ATB | rosuvastatin calcium (as rosuvastatin 20mg) + valsartan 0.16g                                                                    |
| 527100ATB | atorvastatin calcium (as atorvastatin 10mg) + irbesartan 0.3g                                                                    |
| 630100ATB | rosuvastatin calcium(as rosuvastatin 10mg) + telmisartan 80mg                                                                    |
| 633800ATB | atorvastatin calcium(as atorvastatin 10mg) + ezetimibe 10mg                                                                      |
| 635200ATB | pitavastatin calcium 4mg + valsartan 80mg                                                                                        |
| 653200ATB | olmesartan medoxomil 40mg + rosuvastatin calcium (as rosuvastatin 10mg)                                                          |
| 661800ATB | candesartan cilexetil 8mg + rosuvastatin calcium (as rosuvastatin 5mg)                                                           |
| 664000ATB | amlodipine camsylate (as amlodipine 5mg) + losartan potassium (as losartan 45.8mg) + rosuvastatin calcium (as rosuvastatin 10mg) |

---

**(B) PCI (percutaneous coronary intervention) code**

| code  | Code name                                                                     |
|-------|-------------------------------------------------------------------------------|
| M6561 | Percutaneous Transcatheter Placement of Intracoronary Stent-Single Vessel     |
| M6562 | Percutaneous Transcatheter Placement of Intracoronary Stent-Additional Vessel |
| M6563 | Percutaneous Transcatheter Placement of Intracoronary Stent                   |
| M6564 | Percutaneous Transcatheter Placement of Intracoronary Stent                   |
| M6565 | PCI of culprit lesion in acute myocardial infarction                          |
| M6566 | PCI of Chronic total occlusion                                                |
| M6567 | Percutaneous Transcatheter Placement of Intracoronary Stent                   |
| M6551 | Percutaneous Transluminal Coronary Angioplasty-Single Vessel                  |
| M6552 | Percutaneous Transluminal Coronary Angioplasty-Additional Vessel              |
| M6553 | PTCA of culprit lesion in acute myocardial infarction                         |
| M6554 | PTCA of Chronic Total Occlusion                                               |
| M6634 | Percutaneous Thrombus Removal-Thrombolysis-Coronary Artery                    |
| M6638 | Percutaneous Thrombus Removal-Mechanical thrombectomy(Coronary Artery)        |
| M6571 | Percutaneous Transluminal Coronary Atherectomy-Single Vessel                  |
| M6572 | Percutaneous Transluminal Coronary Atherectomy-Additional Vessel              |
