# Supplementary material
Source: publisher figshare collection journal article supplement (https://diabetesjournals.figshare.com/articles/dataset/_/14597091)
Supplement: Supplementary file 2 [file 1]

## **Supplementary Figure Legends**

**Supplementary Figure 1.** Study flow of fenofibrate users vs. non-users

**Supplementary Figure 2.** Composite event rate stratified by quartile of duration of fenofibrate use (log rank < 0.0001)
