# Supplementary material
Source: publisher figshare collection journal article supplement (https://diabetesjournals.figshare.com/articles/dataset/_/14597091)
Supplement: Supplementary file 3 [file 1]

**Supplementary table 2.** Composite event rate by quartile of duration of fenofibrate use after multiple adjustment (crude and model 1 to 8)

| Model            | Variable     | Outcome Composite Events (MI/Stroke/PCI/Cardiac Death) |           |         |           |        |                     | p-value |
|------------------|--------------|--------------------------------------------------------|-----------|---------|-----------|--------|---------------------|---------|
|                  |              | TOTAL (N)                                              | Event (N) | PY (N)  | Event (%) | PY (%) | HR                  |         |
| Crude            | feno/omega - | 5,057                                                  | 258       | 16607.1 | 5.10%     | 15.5   | 1.00 (reference)    |         |
|                  | Q1           | 1,061                                                  | 73        | 3188.4  | 6.88%     | 22.9   | 1.435 (1.106,1.86)  | 0.0065  |
|                  | Q2           | 1,465                                                  | 67        | 4370.6  | 4.57%     | 15.3   | 0.958 (0.732,1.254) | 0.7563  |
|                  | Q3           | 1,266                                                  | 44        | 3549.4  | 3.48%     | 12.4   | 0.76 (0.552,1.047)  | 0.0930  |
|                  | Q4           | 1,265                                                  | 23        | 4382.2  | 1.82%     | 5.2    | 0.342 (0.223,0.524) | <.0001  |
| Adjusted Model 1 | feno/omega - | 5,057                                                  | 258       | 16607.1 | 5.10%     | 15.5   | 1.00 (reference)    |         |
|                  | Q1           | 1,061                                                  | 73        | 3188.4  | 6.88%     | 22.9   | 1.396 (1.076,1.81)  | 0.012   |
|                  | Q2           | 1,465                                                  | 67        | 4370.6  | 4.57%     | 15.3   | 0.989 (0.756,1.294) | 0.9361  |
|                  | Q3           | 1,266                                                  | 44        | 3549.4  | 3.48%     | 12.4   | 0.788 (0.572,1.086) | 0.1453  |
|                  | Q4           | 1,265                                                  | 23        | 4382.2  | 1.82%     | 5.2    | 0.357 (0.233,0.548) | <.0001  |
| Adjusted Model 2 | feno/omega - | 5,057                                                  | 258       | 16607.1 | 5.10%     | 15.5   | 1.00 (reference)    |         |
|                  | Q1           | 1,061                                                  | 73        | 3188.4  | 6.88%     | 22.9   | 1.398 (1.078,1.814) | 0.0115  |
|                  | Q2           | 1,465                                                  | 67        | 4370.6  | 4.57%     | 15.3   | 0.99 (0.757,1.296)  | 0.9428  |
|                  | Q3           | 1,266                                                  | 44        | 3549.4  | 3.48%     | 12.4   | 0.79 (0.574,1.089)  | 0.1502  |
|                  | Q4           | 1,265                                                  | 23        | 4382.2  | 1.82%     | 5.2    | 0.356 (0.232,0.546) | <.0001  |
| Adjusted Model 3 | feno/omega - | 5,057                                                  | 258       | 16607.1 | 5.10%     | 15.5   | 1.00 (reference)    |         |
|                  | Q1           | 1,061                                                  | 73        | 3188.4  | 6.88%     | 22.9   | 1.464 (1.128,1.9)   | 0.0042  |
|                  | Q2           | 1,465                                                  | 67        | 4370.6  | 4.57%     | 15.3   | 0.998 (0.762,1.306) | 0.9878  |
|                  | Q3           | 1,266                                                  | 44        | 3549.4  | 3.48%     | 12.4   | 0.809 (0.587,1.114) | 0.1945  |
|                  | Q4           | 1,265                                                  | 23        | 4382.2  | 1.82%     | 5.2    | 0.351 (0.229,0.538) | <.0001  |
| Adjusted Model 4 | feno/omega - | 5,057                                                  | 258       | 16607.1 | 5.10%     | 15.5   | 1.00 (reference)    |         |
|                  | Q1           | 1,061                                                  | 73        | 3188.4  | 6.88%     | 22.9   | 1.464 (1.128,1.901) | 0.0042  |
|                  | Q2           | 1,465                                                  | 67        | 4370.6  | 4.57%     | 15.3   | 0.986 (0.753,1.291) | 0.9164  |
|                  | Q3           | 1,266                                                  | 44        | 3549.4  | 3.48%     | 12.4   | 0.821 (0.595,1.131) | 0.2269  |
|                  | Q4           | 1,265                                                  | 23        | 4382.2  | 1.82%     | 5.2    | 0.344 (0.224,0.527) | <.0001  |
| Adjusted Model 5 | feno/omega - | 5,057                                                  | 258       | 16607.1 | 5.10%     | 15.5   | 1.00 (reference)    |         |
|                  | Q1           | 1,061                                                  | 73        | 3188.4  | 6.88%     | 22.9   | 1.466 (1.129,1.903) | 0.0041  |
|                  | Q2           | 1,465                                                  | 67        | 4370.6  | 4.57%     | 15.3   | 0.987 (0.754,1.292) | 0.923   |
|                  | Q3           | 1,266                                                  | 44        | 3549.4  | 3.48%     | 12.4   | 0.821 (0.596,1.132) | 0.2291  |
|                  | Q4           | 1,265                                                  | 23        | 4382.2  | 1.82%     | 5.2    | 0.344 (0.225,0.528) | <.0001  |
| Adjusted Model 6 | feno/omega - | 5,057                                                  | 258       | 16607.1 | 5.10%     | 15.5   | 1.00 (reference)    |         |
|                  | Q1           | 1,061                                                  | 73        | 3188.4  | 6.88%     | 22.9   | 1.466 (1.129,1.904) | 0.0041  |
|                  | Q2           | 1,465                                                  | 67        | 4370.6  | 4.57%     | 15.3   | 0.974 (0.744,1.276) | 0.85    |
|                  | Q3           | 1,266                                                  | 44        | 3549.4  | 3.48%     | 12.4   | 0.833 (0.605,1.149) | 0.2661  |
|                  | Q4           | 1,265                                                  | 23        | 4382.2  | 1.82%     | 5.2    | 0.349 (0.227,0.535) | <.0001  |
| Adjusted Model 7 | feno/omega - | 5,057                                                  | 258       | 16607.1 | 5.10%     | 15.5   | 1.00 (reference)    |         |
|                  | Q1           | 1,061                                                  | 73        | 3188.4  | 6.88%     | 22.9   | 1.507 (1.16,1.958)  | 0.0021  |
|                  | Q2           | 1,465                                                  | 67        | 4370.6  | 4.57%     | 15.3   | 1.001 (0.764,1.311) | 0.9953  |
|                  | Q3           | 1,266                                                  | 44        | 3549.4  | 3.48%     | 12.4   | 0.812 (0.589,1.119) | 0.2033  |
|                  | Q4           | 1,265                                                  | 23        | 4382.2  | 1.82%     | 5.2    | 0.352 (0.229,0.539) | <.0001  |
| Adjusted Model 8 | feno/omega - | 5,057                                                  | 258       | 16607.1 | 5.10%     | 15.5   | 1.00 (reference)    |         |
|                  | Q1           | 1,061                                                  | 73        | 3188.4  | 6.88%     | 22.9   | 1.52 (1.169,1.977)  | 0.0018  |
|                  | Q2           | 1,465                                                  | 67        | 4370.6  | 4.57%     | 15.3   | 0.989 (0.755,1.296) | 0.9364  |
|                  | Q3           | 1,266                                                  | 44        | 3549.4  | 3.48%     | 12.4   | 0.832 (0.604,1.148) | 0.2631  |
|                  | Q4           | 1,265                                                  | 23        | 4382.2  | 1.82%     | 5.2    | 0.347 (0.226,0.532) | <.0001  |

Adjusted model 1: Age, Sex

Adjusted model 2: Age, Sex, income group

Adjusted model 3: Age, Sex, income group, MI history, Angina history, Other CAD history

Adjusted model 4: Age, Sex, income group, MI history, Angina history, Other CAD history, AF history, HF history, PCI history

Adjusted model 5: Age, Sex, income group, MI history, Angina history, Other CAD history, AF history, HF history, PCI history, CKD history

Adjusted model 6: Age, Sex, income group, MI history, Angina history, Other CAD history, AF history, HF history, PCI history, CKD history, BMI group, Smoking, LDL-C group

Adjusted model 7: Age, Sex, income group, MI history, Angina history, Other CAD history, AF history, BMI group, Smoking, LDL-C group, HTN history

Adjusted model 8: Age, Sex, income group, MI history, Angina history, Other CAD history, AF history, HF history, PCI history, CKD history, BMI group, Smoking, LDL-C group, HTN history, HDL-C group, TG group

\*feno, fenofibrate; omega, omega-3 fatty acid; Q, quartile; PY, person-year; HR, hazard ratio; MI, myocardial infarction; PCI, percutaneous coronary intervention; CAD, coronary artery disease; AF, atrial fibrillation; HF, heart failure; CKD, chronic kidney disease; HTN, hypertension; TG, triglyceride
